# Supplementary material for: Co-catalysed VLS growth of novel ceramic nanostructuresElectronic supplementary information (ESI) available: TEM, SEM and HRTEM images for MgO, SiOx and AlOx ceramic nanomaterials. See http://www.rsc.org/suppdata/jm/b3/b312498n/
Source: Royal Society of Chemistry journal article supplement (doi:10.1039/b312498n), 2004-01-01
Supplement: b312498n.doc [file b312498n.doc]

# SUPPLEMENTARY INFORMATION


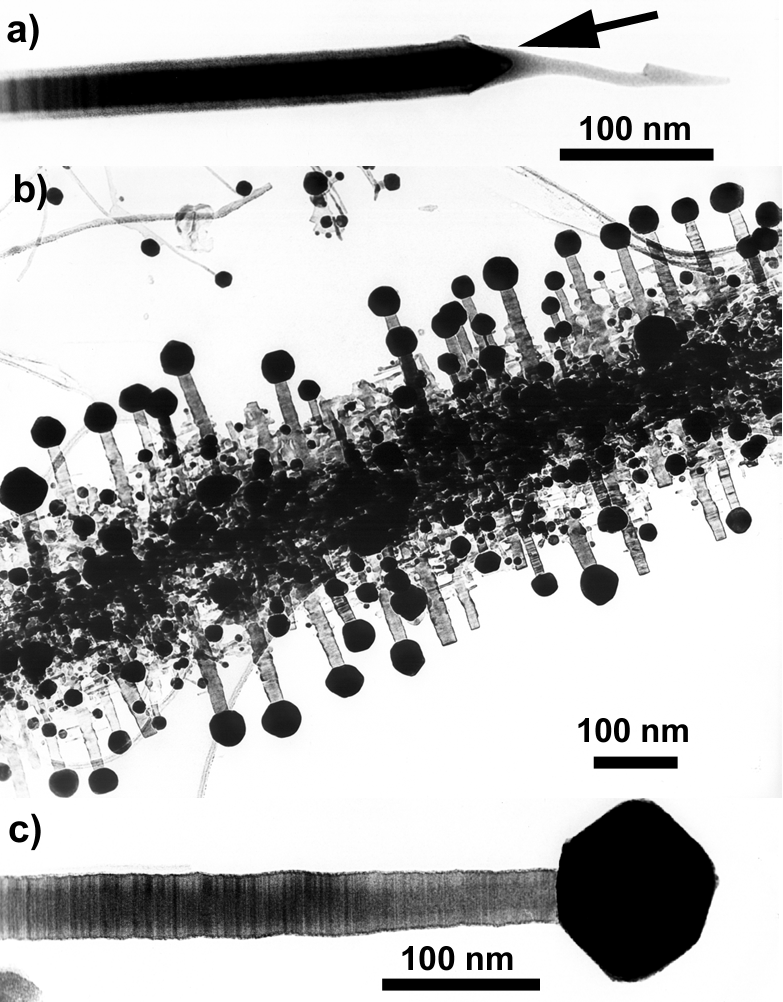


Figure S1. MgO fishbone nanostructures TEM images. (a) Al2O3 nanofibre (dark core) wrapped in an amorphous silicon oxide layer (bright shell). (b) Part of the fishbone structure. (c) A typical MgO fibre with a polygonal Co particle in the tip.

# SUPPLEMENTARY INFORMATION


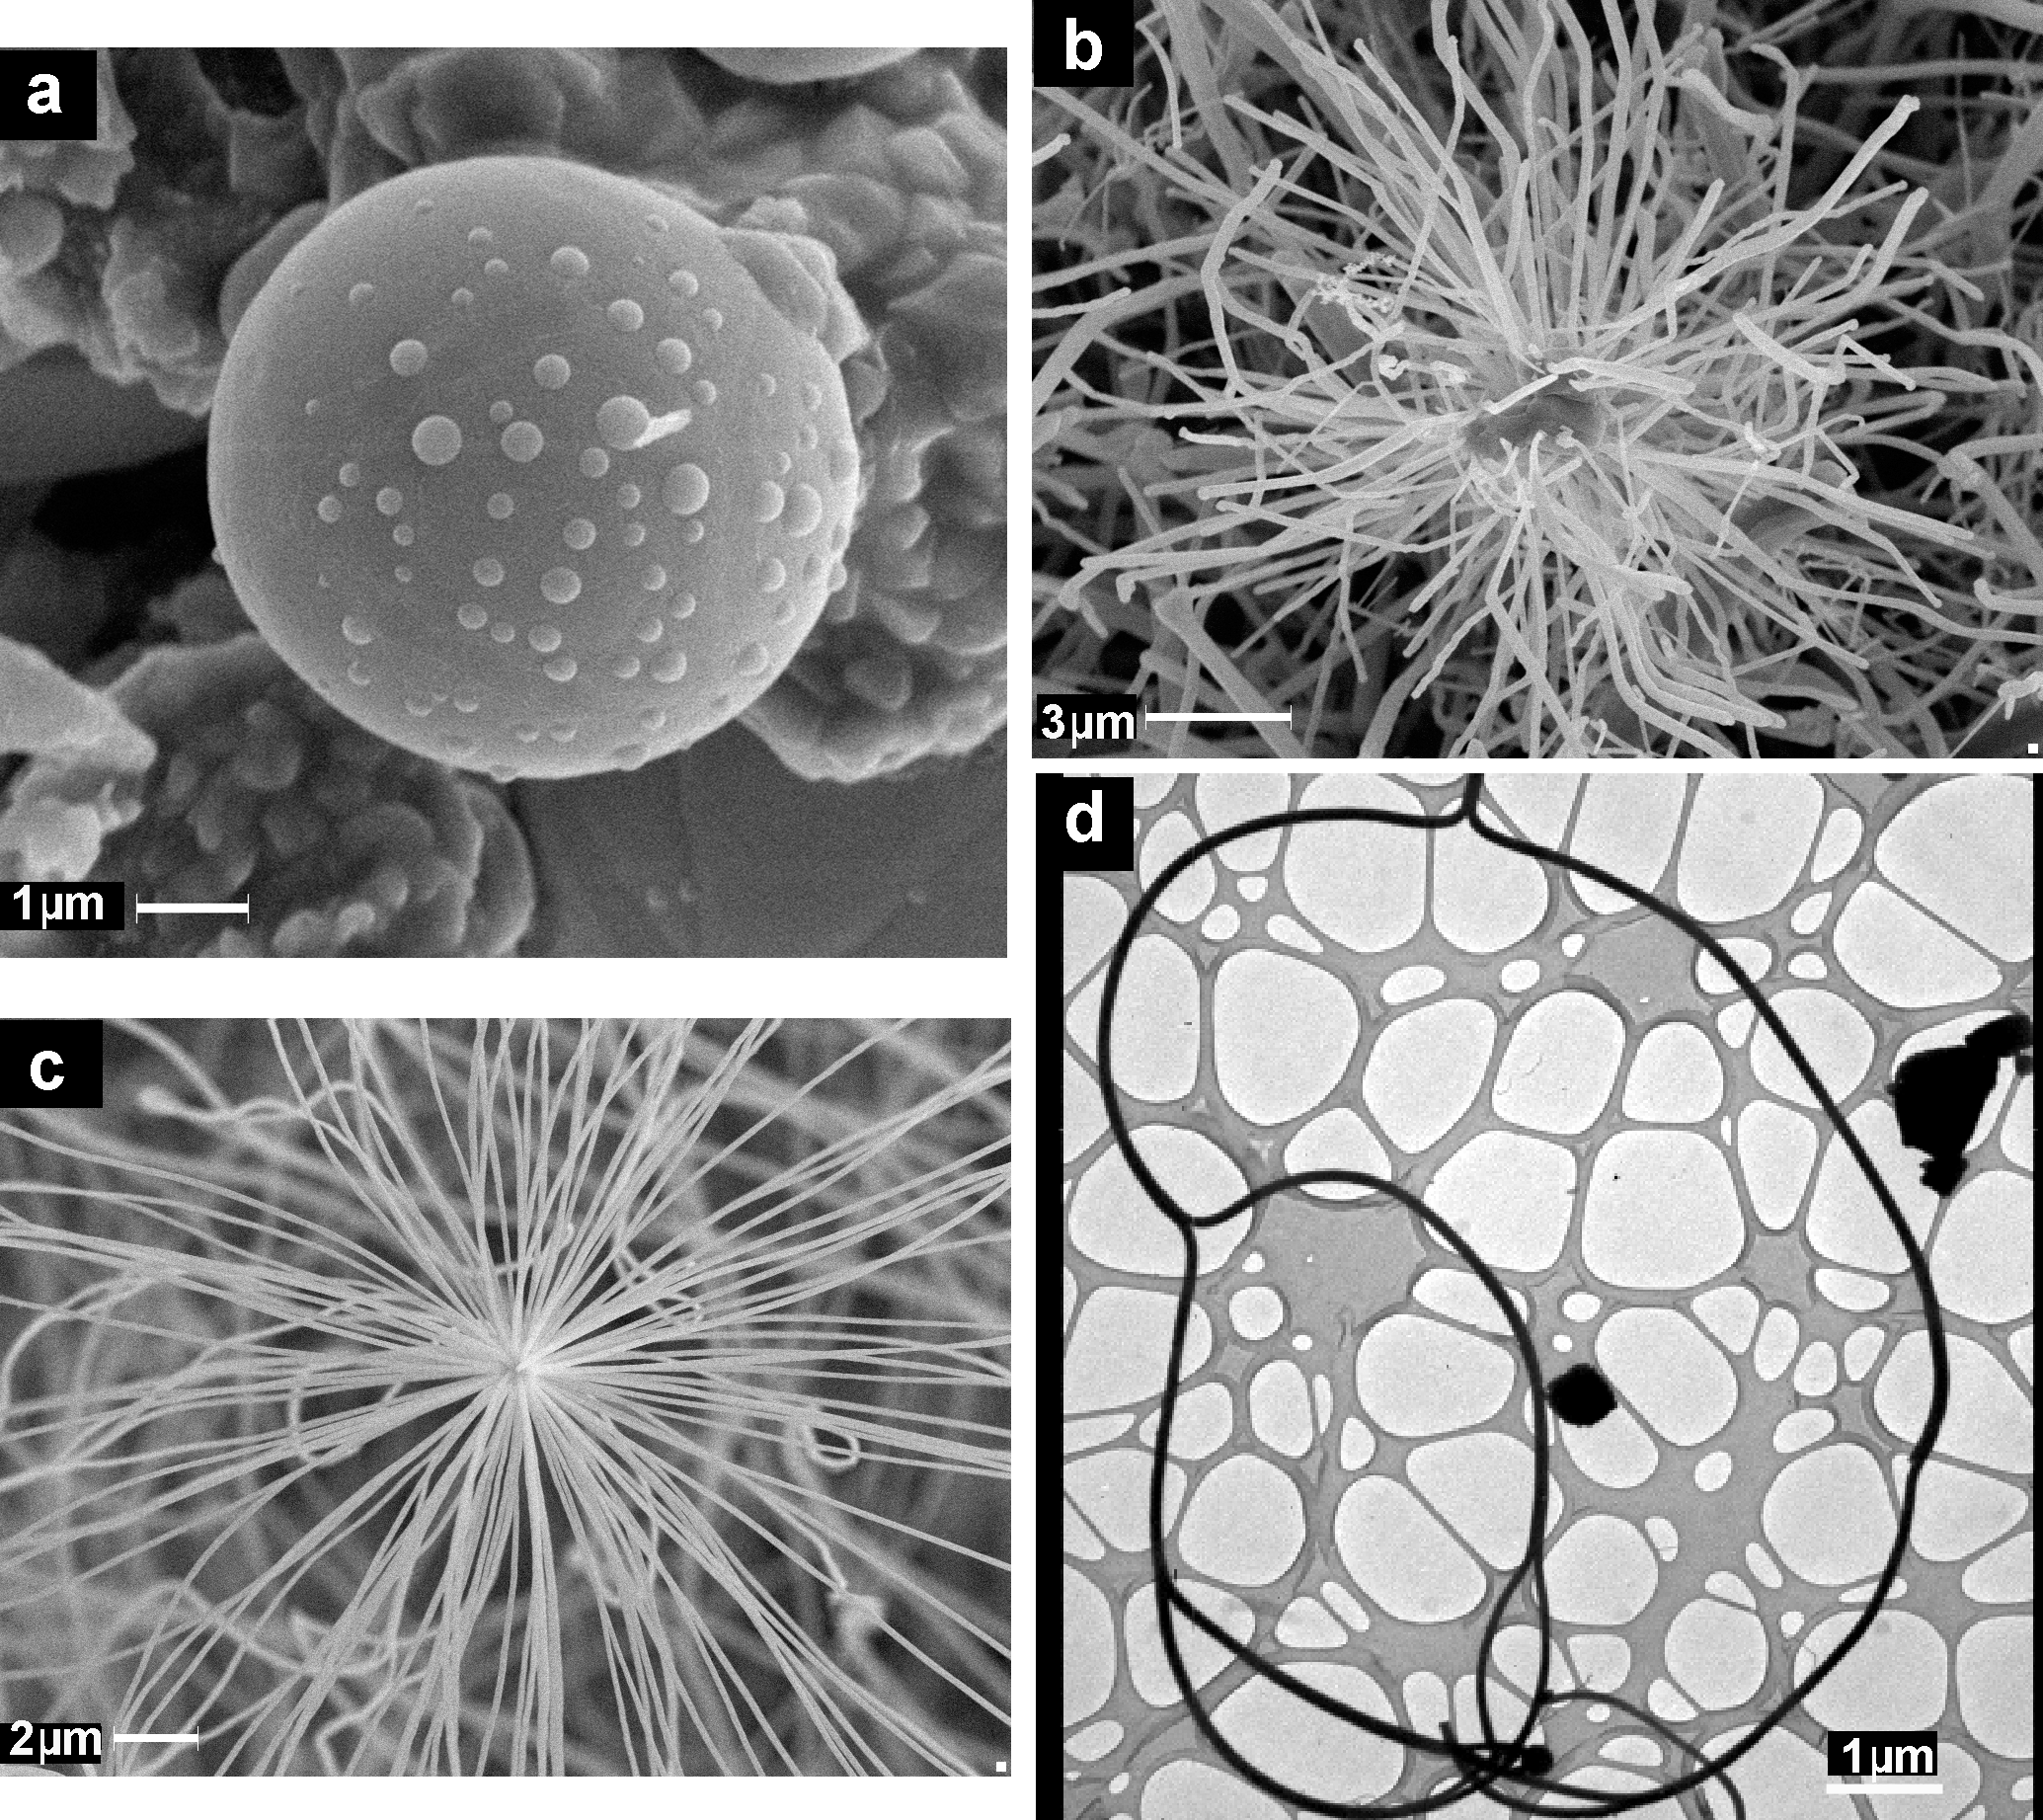


Figure S2. SiOx nanoflowers SEM and TEM images, demonstrating various stage of the growth. (a) Co spherical exhibiting random blisters. (b) Intermediate growth stage of a nanoflower. (c) A well-developed 3D nanoflower structure. (d) Multiple nanofibre loops.

# SUPPLEMENTARY INFORMATION


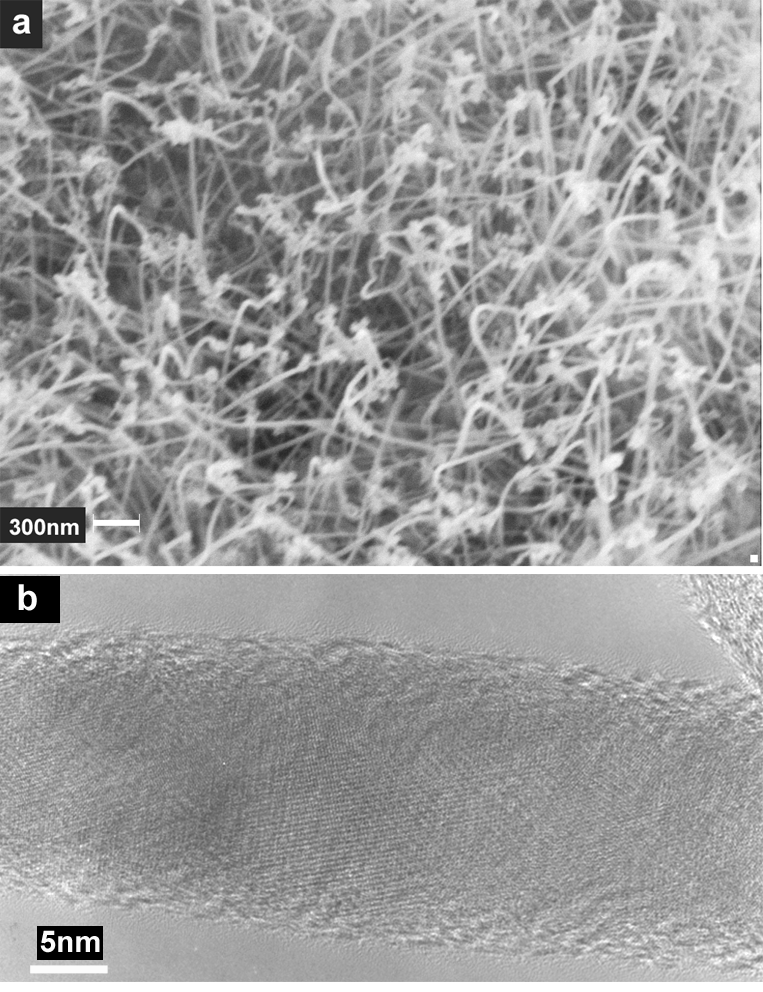


Figure S3. Flexible AlOx nanofibres images. (a) A typical SEM image of numerous nanofibres (10-50 nm in diameters). (b) HRTEM image of a single nanofibre.
